# Supplementary material
Source: Springer Nature journal article supplement (https://www.springermedizin.de/resource/supplementary/13256_2012_2380_MOESM5_ESM.pdf/9649340)
Supplement: MOESM5 [file 9649340]

Table 1. Characteristics of patients with LEMS associated with lung adenocarcinoma.

| Case no.       | Year | First author           | Age | Sex | Site | Histological grade | Coexistent collagen disease | Treatment                           | Outcome                                |
|----------------|------|------------------------|-----|-----|------|--------------------|-----------------------------|-------------------------------------|----------------------------------------|
| 1              | 1987 | Ramos-Yeo <sup>7</sup> | 56  | M   | RLL  | Poor               | None                        | Steroid,<br>plasmapheresis          | Death at 2 years<br>(due to infection) |
| 2 <sup>a</sup> | 1989 | Sumitomo <sup>11</sup> | 58  | M   | RML  | Poor               | None                        | Lobectomy,<br>adjuvant chemotherapy | Surviving at 2 years                   |
| 3 <sup>a</sup> | 1996 | Okudera <sup>12</sup>  | 32  | M   | RUL  | Poor               | None                        | Chemotherapy                        | Death at 5 months<br>(due to DIC)      |
| 4              | 2008 | Milanez <sup>10</sup>  | 66  | M   | RUL  | Moderate           | DM                          | Lobectomy                           | Death at 16 days<br>(due to sepsis)    |
| 5              | 2012 | Present case           | 75  | M   | RLL  | Moderate           | RA, Sjs                     | Lobectomy                           | Surviving at 4 months                  |

a: English abstract only; RLL: right lower lobe; RML: right middle lobe; RUL: right upper lobe; DM: dermatomyositis; RA: rheumatoid arthritis; Sjs: Sjogren syndrome; DIC: disseminated intravascular coagulation
